# Supplementary material for: Evolution of Optimized Hydride Transfer Reaction and Overall Enzyme Turnover in Human Dihydrofolate Reductase
Source: PubMed Central journal article supplement (PMC8697555; doi:10.1021/acs.biochem.1c00558), 2021-12-07
Supplement: bi1c00558_si_001.pdf [file bi1c00558_si_001.pdf]

# Evolution of Optimized Hydride Transfer Reaction and Overall Enzyme Turnover in Human Dihydrofolate Reductase

**Author List:** Jiayue Li,<sup>1</sup> Jennifer Lin,<sup>1</sup> Amnon Kohen,<sup>1</sup> Priyanka Singh,<sup>1</sup> Kevin Francis<sup>\*2</sup>,

Christopher M. Cheatum<sup>\*1</sup>

## **Institution Addresses:**

<sup>1</sup> Department of Chemistry, University of Iowa, Iowa City, IA 52242

<sup>2</sup> Texas A&M University-Kingsville, Kingsville. TX, 78363

## **Author Information Notes:**

\* Authors to whom correspondence should be addressed:

Email: [christopher-cheatum@uiowa.edu](mailto:christopher-cheatum@uiowa.edu) Phone: +1 319 353 0379

[kevin.francis@tamuk.edu](mailto:kevin.francis@tamuk.edu) Phone: + 1 361 595 2923

**Table S1: Primers Used in This Study**

| mutant                             | primer sequence                                                                                         |
|------------------------------------|---------------------------------------------------------------------------------------------------------|
| F32M                               | 5'-GGCCACCGCTCAGGAATGAAATGAGATATTTCCAGAGAATGAC-3'<br>5'-GTCATTCTCTGGAAATATCTCATTTTCATTCCTGAGCGGTGGCC-3' |
| F32L                               | 5'-CCACCGCTCAGGAATGAATTGAGATATTTCCAGAGAATGAC-3'<br>5'-GTCATTCTCTGGAAATATCTCAATTCATTCCTGAGCGGTGG-3'      |
| PP26N                              | 5'-GACCTGCCCTGGCTCAGGAATGAATTC-3'<br>5'-GAATTCATTCCTGAGCCAGGGCAGGTC-3'                                  |
| PEKN62G                            | 5' CTGGTTCTCCATTCGAAGAATTAATTTAGTTC-3'<br>5' GAACTAAATTAATTCTTCGAATGGAGAACCAG 3'                        |
| $\Delta$ 62-PEKN                   | 5' GGTTCTCCATTCGACCTTTAAAGGG 3'<br>5' CCCTTTAAAGGTCGAATGGAGAACC-3'                                      |
| $\Delta$ 26-PPLR- $\Delta$ 62-PEKN | 5' ACCTGCCCTGGCCAGAATTCAGATA 3'<br>5' TATCTGAATTCTGGCCAGGGCAGGT 3'                                      |

**Table S2: Intrinsic and Observed KIEs of F32M hsDHFR at pH 9.0<sup>a</sup>**

| Temp.<br>°C | Observed<br>H/T KIE | Observed D/T<br>KIE | Intrinsic<br>H/T KIE |
|-------------|---------------------|---------------------|----------------------|
| 5           | 1.89 ± 0.04         | 1.48 ± 0.01         | 36.38 ± 1.41         |
| 15          | 2.29 ± 0.04         | 1.60 ± 0.01         | 31.06 ± 0.90         |
| 25          | 1.85 ± 0.03         | 1.43 ± 0.01         | 24.78 ± 0.90         |
| 35          | 2.66 ± 0.06         | 1.70 ± 0.02         | 22.29 ± 0.41         |

<sup>a</sup> Observed KIEs were measured in 50 mM METN buffer (50 mM MES, 25 mM Tris, 25 mM ethanolamine, and 100 mM NaCl). The values represent at least 5 independent measurements with their standard deviation.

**Table S3: Intrinsic and Observed KIEs of F32L hsDHFR at pH 9.0<sup>a</sup>**

| Temp.<br>°C | Observed<br>H/T KIE | Observed D/T<br>KIE | Intrinsic<br>H/T KIE |
|-------------|---------------------|---------------------|----------------------|
| 5           | 1.91 ± 0.03         | 1.41 ± 0.04         | 19.06 ± 1.05         |
| 15          | 2.00 ± 0.05         | 1.39 ± 0.01         | 11.24 ± 0.82         |
| 25          | 1.93 ± 0.14         | 1.36 ± 0.06         | 8.44 ± 1.91          |
| 35          | 1.90 ± 0.01         | 1.31 ± 0.01         | 5.93 ± 0.19          |

<sup>a</sup> Observed KIEs were measured in 50 mM METN buffer (50 mM MES, 25 mM Tris, 25 mM ethanolamine, and 100 mM NaCl). The values represent at least 5 independent measurements with their standard deviation.

**Table S4: Intrinsic and Observed KIEs of F32L-PP26N-PEKN62G hDHFR at pH 9.0<sup>a</sup>**

| Temp.<br>°C | Observed<br>H/T KIE | Observed D/T<br>KIE | Intrinsic<br>H/T KIE |
|-------------|---------------------|---------------------|----------------------|
| 5           | 1.97 ± 0.02         | 1.44 ± 0.01         | 19.31 ± 0.37         |
| 15          | 3.01 ± 0.05         | 1.70 ± 0.01         | 18.09 ± 0.93         |
| 25          | 3.10 ± 0.02         | 1.75 ± 0.01         | 20.29 ± 0.26         |
| 35          | 3.42 ± 0.02         | 1.78 ± 0.01         | 18.38 ± 0.21         |

<sup>a</sup> Observed KIEs were measured in 50 mM METN buffer (50 mM MES, 25 mM Tris, 25 mM ethanolamine, and 100 mM NaCl). The values represent at least 5 independent measurements with their standard deviation.

**Table S5: Intrinsic and Observed KIEs of  $\Delta 62$ -PEKN hDHFR at pH 9.0<sup>a</sup>**

| Temp.<br>°C | Observed<br>H/T KIE | Observed<br>D/T KIE | Intrinsic<br>H/T KIE |
|-------------|---------------------|---------------------|----------------------|
| 5           | 4.13 ± 0.02         | 1.64 ± 0.02         | 6.92 ± 0.18          |
| 15          | 3.97 ± 0.04         | 1.62 ± 0.01         | 6.71 ± 0.14          |
| 25          | 3.77 ± 0.03         | 1.60 ± 0.03         | 6.63 ± 0.20          |
| 35          | 3.53 ± 0.02         | 1.57 ± 0.01         | 6.37 ± 0.16          |
| 45          | 3.40 ± 0.03         | 1.55 ± 0.02         | 6.24 ± 0.21          |

<sup>a</sup> Observed KIEs were measured in 50 mM METN buffer (50 mM MES, 25 mM Tris, 25 mM ethanolamine, and 100 mM NaCl). The values represent at least 5 independent measurements with their standard deviation.

**Table S6: Intrinsic and Observed KIEs of  $\Delta 26$ -PPLR- $\Delta 62$ -PEKN hDHFR at pH 9.0<sup>a</sup>**

| Temp.<br>°C | Observed<br>H/T KIE | Observed<br>D/T KIE | Intrinsic<br>H/T KIE |
|-------------|---------------------|---------------------|----------------------|
| 5           | 3.96 ± 0.02         | 1.57 ± 0.01         | 5.36 ± 0.14          |
| 15          | 3.60 ± 0.02         | 1.54 ± 0.01         | 5.43 ± 0.17          |
| 25          | 3.39 ± 0.01         | 1.52 ± 0.01         | 5.35 ± 0.15          |
| 35          | 3.17 ± 0.03         | 1.50 ± 0.02         | 5.43 ± 0.21          |
| 45          | 3.02 ± 0.01         | 1.48 ± 0.01         | 5.33 ± 0.12          |

<sup>a</sup> Observed KIEs were measured in 50 mM METN buffer (50 mM MES, 25 mM Tris, 25 mM ethanolamine, and 100 mM NaCl). The values represent at least 5 independent measurements with their standard deviation.
